# Supplementary material for: Health aspects of groundwater pollution.
Source: Springer Nature journal article supplement (doi:10.1038/nature20796), 1994-01-01
Supplement: nature20796-s1.pdf [file nature20796-s1.pdf]

Experiments depicted in this study exclusively utilized wild-type C57Bl/6 mice. Colonized wild-type C57Bl/6 mice were obtained as littermates from a commercial source and acclimatized to the local vivarium for 2 weeks before the onset of each experiment. Mice for each experiment were purchased together and obtained through a single delivery. Before dietary interventions, mice were randomized to ensure that no incidental pre-diet differences in body weight, body fat content, or microbiome composition existed between the different groups (**Supplementary Figure 1**). Mice were initially exposed to HFD for 4 weeks (Fig. 3c, 5 weeks), followed by NC diet in the weight cycling group, until the weight of the NC control group was reached. Six independent repeats of this experimental scheme of the main phenotype appear in Fig. 1b, 1j, 1l, 5b, 6b, and Extended Data Fig. 10f. Three additional independent repetitions are provided in **Supplementary Figure 2**. Expectedly, the weight loss time period slightly differed between experiments, as did the time required to reach the HFD control weight after subsequent re-administration of HFD to the weight cycling group.

Metabolic abnormalities induced by 4 weeks of high-fat feeding in this study were significant in comparison to normal chow controls, similarly to an 8 week HFD protocol (**Supplementary Figure 3**).

The immunoblot source data for Fig. 6l is provided in **Supplementary Figure 4**.

Information about bacterial species and their flavonoid-metabolizing genes is provided in **Supplementary Table 1**. The composition of the different rodent diets used in this study is provided in **Supplementary Tables 2 and 3**. **Supplementary Table 4** shows the chromatographic conditions for apigenin and naringenin separation.

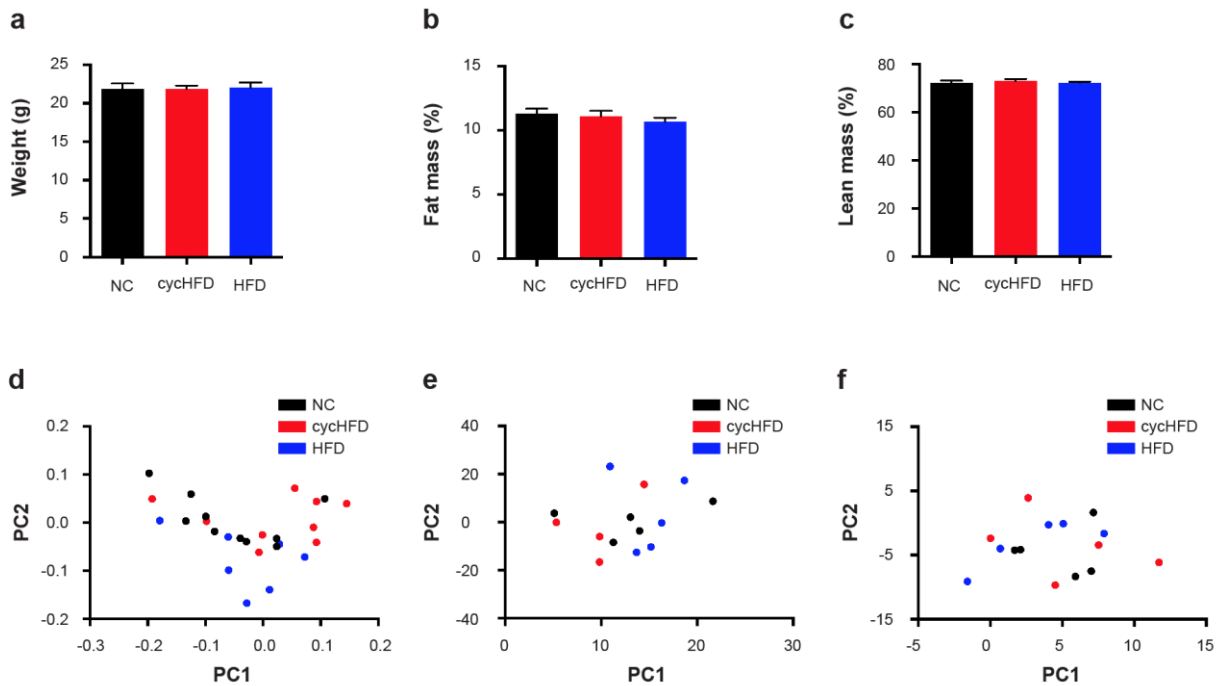

**Supplementary Figure 1 | Metabolic and microbiota parameters before dietary intervention. a-c,** Weights (a), body fat (b) and lean mass (c) before administration of diet. **d,** PCoA of fecal microbiota before administration of diet. **e, f,** PCA of KEGG genes (e) and gene modules (f) before administration of diet.

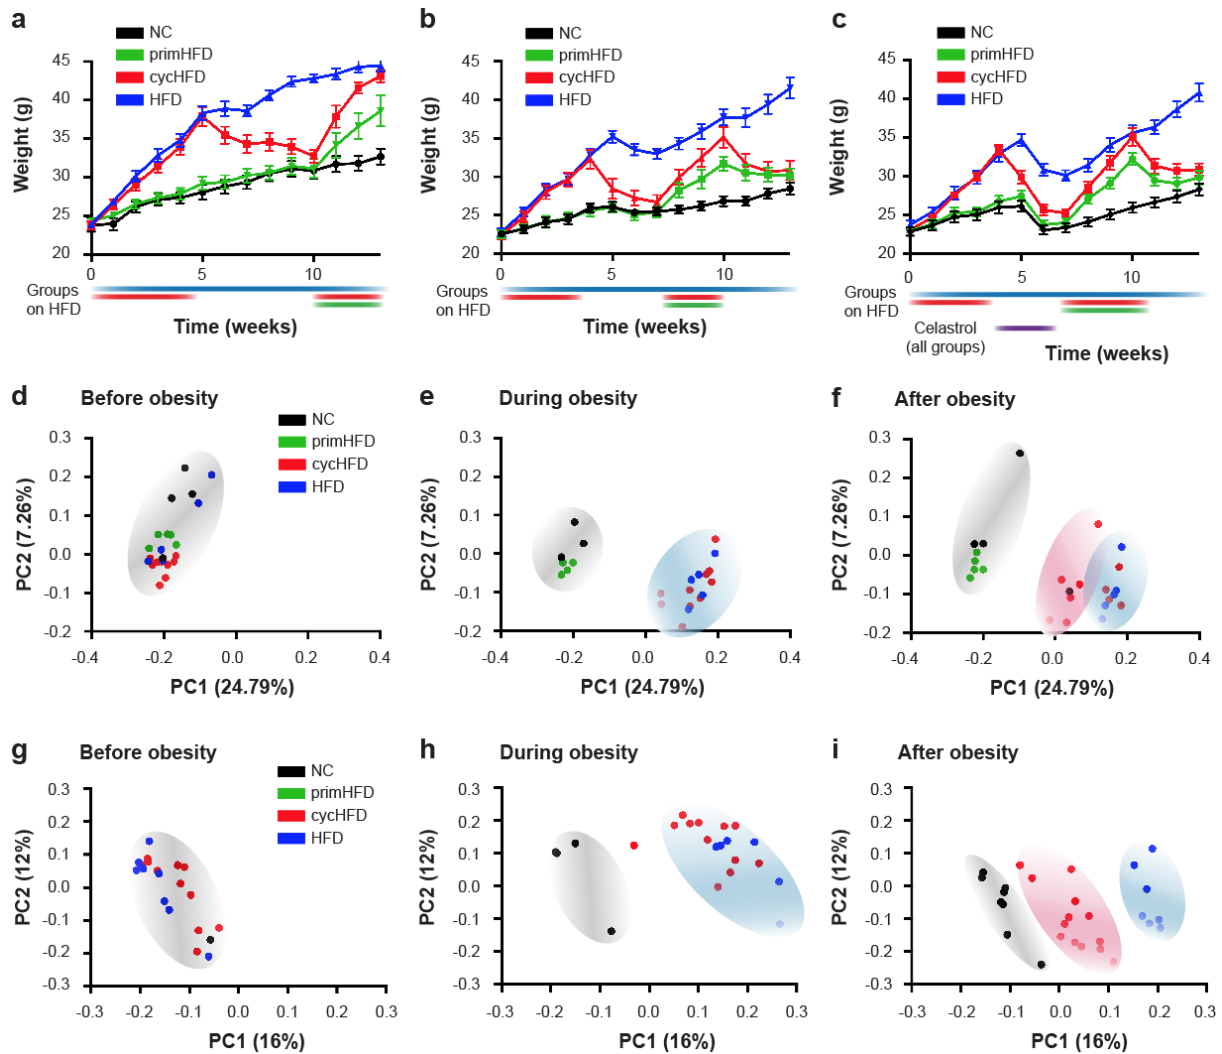

**Supplementary Figure 2 | Enhanced secondary weight gain and incomplete microbiota recovery after dieting.** **a-c**, Weight curves of weight cycling mice and controls. In **(c)**, all groups were treated with celastrol during the weight loss period. **d-i**, PCoA plots of fecal microbiota from the indicated groups before the onset of the experiment (**d, g**), after 4 weeks of HFD (**e, h**), and upon weight normalization in the weight cycling group (**f, i**).

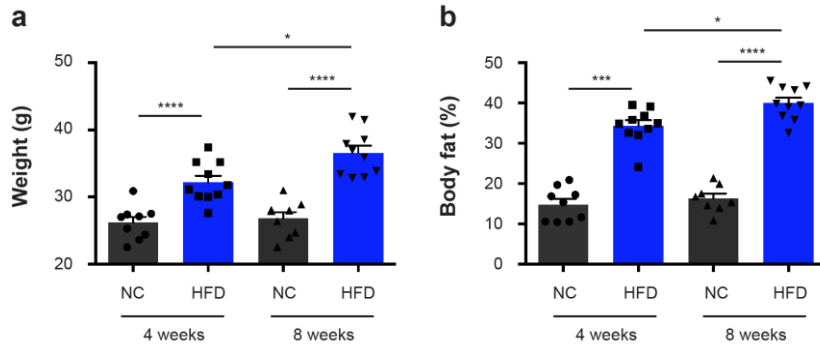

**Supplementary Figure 3 | Comparison of different durations of HFD. Body weight (a) and body fat content (b) after 4 and 8 weeks of HFD feeding.**

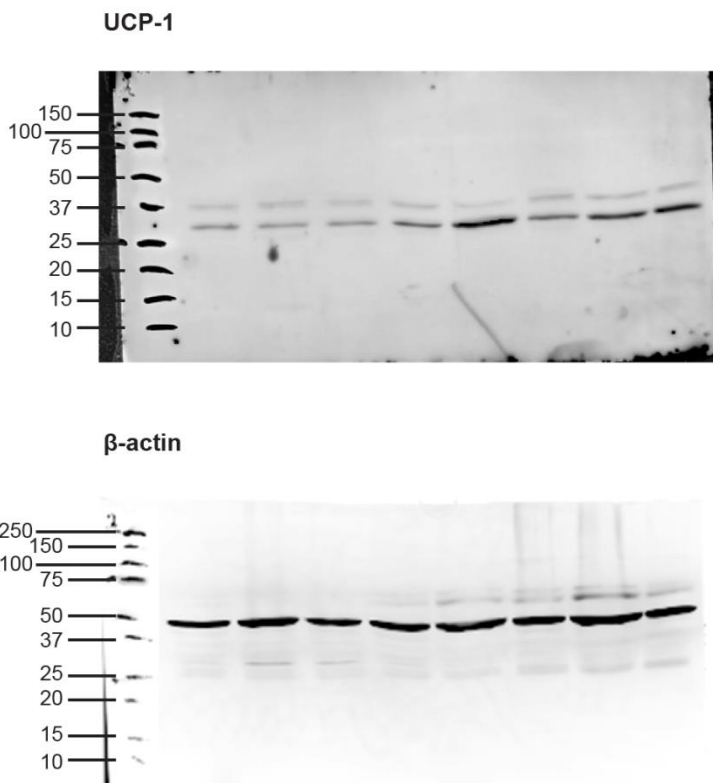

**Supplementary Figure 4 | Immunoblot source data for Fig. 6I. The right four lanes are from antibiotics-treated mice, the left four lanes from controls.**

**Supplementary Table 1 | Flavonoid-metabolizing bacteria.** The table lists bacterial species found in the metagenomic data set which encode for the indicated KEGG genes involved in flavonoid metabolism.

| Name                                                                                                        | KEGG Gene |
|-------------------------------------------------------------------------------------------------------------|-----------|
| Bacilli   Lactobacillales   Streptococcaceae   Lactococcus   Lactococcus lactis   A76                       | K13082    |
| Bacilli   Lactobacillales   Streptococcaceae   Lactococcus   Lactococcus lactis   A76                       | K00660    |
| Bacilli   Lactobacillales   Streptococcaceae   Lactococcus   Lactococcus lactis   CV56                      | K13082    |
| Bacilli   Lactobacillales   Streptococcaceae   Lactococcus   Lactococcus lactis   CV56                      | K00660    |
| Bacilli   Lactobacillales   Streptococcaceae   Lactococcus   Lactococcus lactis   II1403                    | K13082    |
| Bacilli   Lactobacillales   Streptococcaceae   Lactococcus   Lactococcus lactis   II1403                    | K00660    |
| Bacilli   Lactobacillales   Streptococcaceae   Lactococcus   Lactococcus lactis   IO-1                      | K13082    |
| Bacilli   Lactobacillales   Streptococcaceae   Lactococcus   Lactococcus lactis   IO-1                      | K00660    |
| Bacilli   Lactobacillales   Streptococcaceae   Lactococcus   Lactococcus lactis   KF147                     | K13082    |
| Bacilli   Lactobacillales   Streptococcaceae   Lactococcus   Lactococcus lactis   KF147                     | K00660    |
| Bacilli   Lactobacillales   Streptococcaceae   Lactococcus   Lactococcus lactis   KLDS 4.0325               | K13082    |
| Bacilli   Lactobacillales   Streptococcaceae   Lactococcus   Lactococcus lactis   KLDS 4.0325               | K00660    |
| Bacilli   Lactobacillales   Streptococcaceae   Lactococcus   Lactococcus lactis   KW2                       | K13082    |
| Bacilli   Lactobacillales   Streptococcaceae   Lactococcus   Lactococcus lactis   KW2                       | K00660    |
| Bacilli   Lactobacillales   Streptococcaceae   Lactococcus   Lactococcus lactis   MG1363                    | K13082    |
| Bacilli   Lactobacillales   Streptococcaceae   Lactococcus   Lactococcus lactis   MG1363                    | K00660    |
| Bacilli   Lactobacillales   Streptococcaceae   Lactococcus   Lactococcus lactis   NZ9000                    | K13082    |
| Bacilli   Lactobacillales   Streptococcaceae   Lactococcus   Lactococcus lactis   NZ9000                    | K00660    |
| Bacilli   Lactobacillales   Streptococcaceae   Lactococcus   Lactococcus lactis   SK11                      | K13082    |
| Bacilli   Lactobacillales   Streptococcaceae   Lactococcus   Lactococcus lactis   SK11                      | K00660    |
| Bacilli   Lactobacillales   Streptococcaceae   Lactococcus   Lactococcus lactis   UC509.9                   | K13082    |
| Bacilli   Lactobacillales   Streptococcaceae   Lactococcus   Lactococcus lactis   UC509.9                   | K00660    |
| Bacteroidia   Bacteroidales   Bacteroidaceae   Bacteroides   Bacteroides xyloxylosum   XB1A                 | K13082    |
| Bacteroidia   Bacteroidales   Porphyromonadaceae   Parabacteroides   Parabacteroides distasonis   ATCC 8503 | K00660    |

Supplementary Table 2 | Normal chow diet (Teklad 2018).

| Macronutrients             |        | Fatty acids                |       |
|----------------------------|--------|----------------------------|-------|
| Protein                    | 18.6 % | C16:0 Palmitic             | 0.7 % |
| Fat                        | 6.2 %  | C18:0 Stearic              | 0.2 % |
| Carbohydrate               | 44.2 % | C18:1 $\omega$ 9 Oleic     | 1.2 % |
| Crude Fiber                | 3.5 %  | C18:2 $\omega$ 6 Linoleic  | 3.1 % |
| Neutral Detergent Fiber    | 14.7 % | C18:3 $\omega$ 3 Linolenic | 0.3 % |
| Ash                        | 5.3 %  | Total Saturated            | 0.9 % |
| Calories from protein      | 24 %   | Total Monounsaturated      | 1.3 % |
| Calories from fat          | 18 %   | Total Polyunsaturated      | 3.4 % |
| Calories from Carbohydrate | 58 %   | Cholesterol                | -     |

|            |            | Vitamins         |            |
|------------|------------|------------------|------------|
| Calcium    | 1.0 %      | Vitamin A        | 15.0 IU/g  |
| Phosphorus | 0.7 %      | Vitamin D3       | 1.5 IU/g   |
| Sodium     | 0.2 %      | Vitamin E        | 110 IU/g   |
| Potassium  | 0.6 %      | Vitamin K3       | 50 mg/kg   |
| Chloride   | 0.4 %      | Vitamin B1       | 17 mg/kg   |
| Magnesium  | 0.2 %      | Vitamin B2       | 15 mg/kg   |
| Zinc       | 70 %       | Niacin           | 70 mg/kg   |
| Manganese  | 100 mg/kg  | Vitamin B6       | 18 mg/kg   |
| Copper     | 15 mg/kg   | Pantothenic acid | 33 mg/kg   |
| Iodine     | 6 mg/kg    | Vitamin B12      | 0.08 mg/kg |
| Iron       | 200 mg/kg  | Biotin           | 0.4 mg/kg  |
| Selenium   | 0.23 mg/kg | Folate           | 4 mg/kg    |
|            |            | Choline          | 1200 mg/kg |

| Amino acids   |       |               |       |
|---------------|-------|---------------|-------|
| Aspartic Acid | 1.4 % | Valine        | 0.9 % |
| Glutamic Acid | 3.4 % | Phenylalanine | 1.0 % |
| Alanine       | 1.1 % | Tyrosine      | 0.6 % |
| Glycine       | 0.8 % | Methionine    | 0.4 % |
| Threonine     | 0.7 % | Cystine       | 0.3 % |
| Proline       | 1.6 % | Lysine        | 0.9 % |
| Serine        | 1.1 % | Histidine     | 0.4 % |
| Leucine       | 1.8 % | Arginine      | 1.0 % |
| Isoleucine    | 0.8 % | Tryptophan    | 0.2 % |

Supplementary Table 3 | High-fat diet (Open Source Diets D12492).

| Nutrients    | g %  | kcal % |
|--------------|------|--------|
| Protein      | 26.2 | 20     |
| Carbohydrate | 26.3 | 20     |
| Fat          | 34.9 | 60     |

| Ingredients      | g    | kcal  | Ingredients         | g             | kcal        |
|------------------|------|-------|---------------------|---------------|-------------|
| Casein, 80 Mesh  | 200  | 800   | Mineral Mix, S10026 | 10            | 0           |
| L-Cystein        | 3    | 12    | DiCalcium Phosphate | 13            | 0           |
| Maltodextrin 10  | 125  | 500   | Calcium Carbonate   | 5.5           | 0           |
| Sucrose          | 68.8 | 275.2 | Potassium Citrate   | 16.5          | 0           |
| Cellulose, BW200 | 50   | 0     | Vitamin Mix, V10001 | 10            | 40          |
| Soybean Oil      | 25   | 225   | Choline Bitartrate  | 2             | 0           |
| Lard             | 245  | 2205  | FD&C Blue Dye #1    | 0.05          | 0           |
|                  |      |       | <b>Total</b>        | <b>773.85</b> | <b>4057</b> |

Supplementary Table 4 | Chromatographic conditions for apigenin and naringenin separation.

Composition A: 5 %ACN + 0.1% formic acid

Composition B: 100% ACN + 0.1% formic acid

| Time | % A | % B |
|------|-----|-----|
| 0    | 100 | 0   |
| 22   | 72  | 28  |
| 22.5 | 60  | 40  |
| 23   | 0   | 100 |
| 24.5 | 0   | 100 |
| 25   | 100 | 0   |
| 26   | 100 | 0   |

MS parameters, MRM transitions and retention times for apigenin and naringenin

| Analyte    | ESI | Cone(V) | Transitions   | Collision Energy (eV) | RT (min) |
|------------|-----|---------|---------------|-----------------------|----------|
| Naringenin | +   | 35      | 273.1 > 150.0 | 20                    | 19.39    |
|            |     |         | 273.1 > 147.0 | 24                    |          |
| Apigenin   | +   | 53      | 271.1 > 153.0 | 29                    | 19.71    |
|            |     |         | 271.1 > 91.1  | 38                    |          |
